# Supplementary material for: Antibiotic Resistance Gene Abundances Correlate with Metal and Geochemical Conditions in Archived Scottish Soils
Source: PLOS journal article supplement (doi:10.1371/journal.pone.0027300), 2011-11-09
Supplement: S1 (10.1371/journal.pone.0027300.s001) [file journal.pone.0027300.s001]

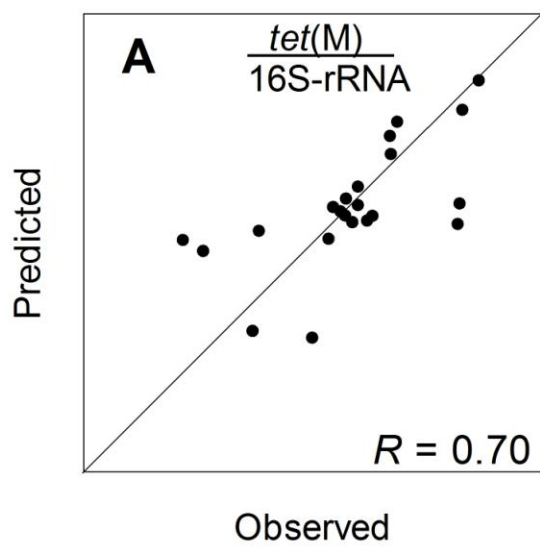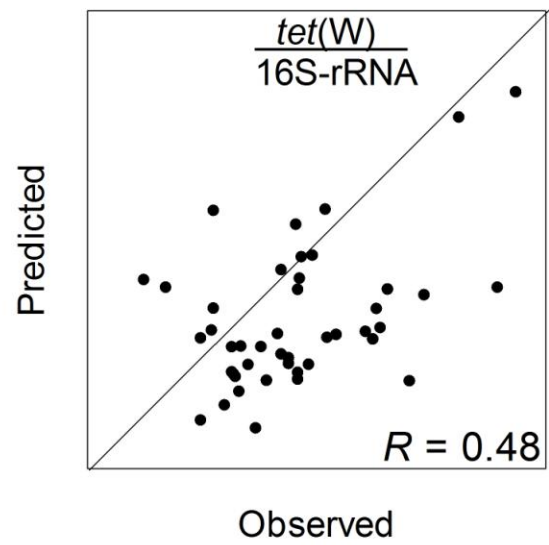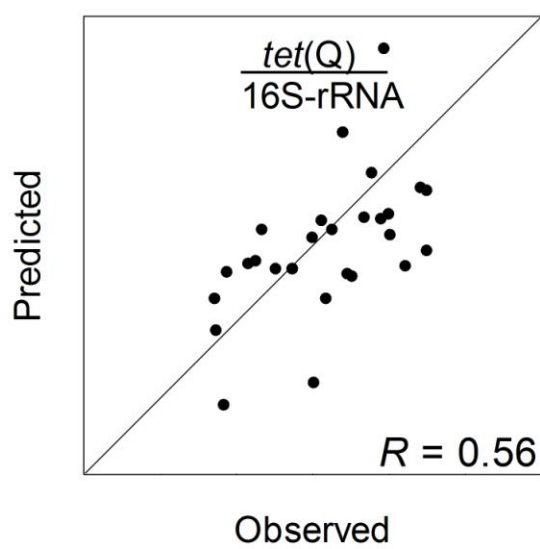

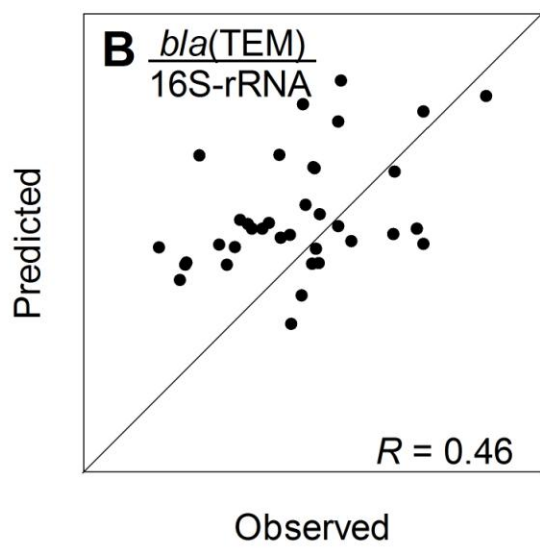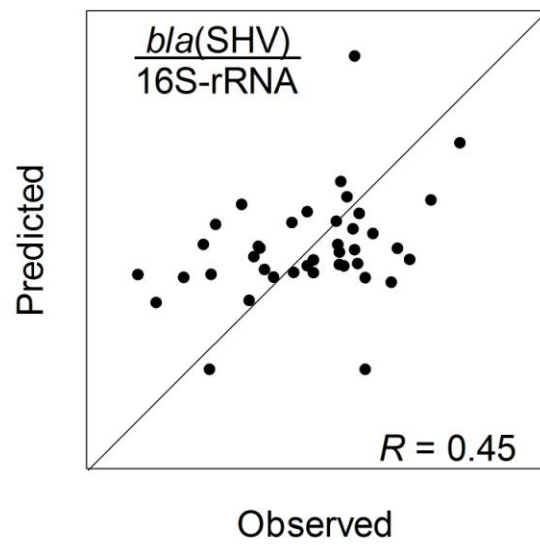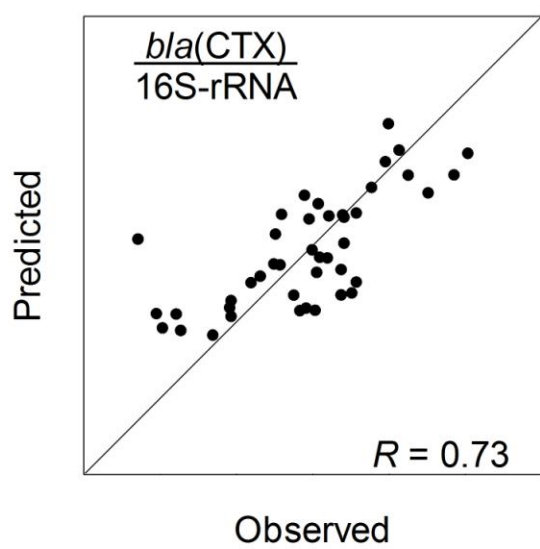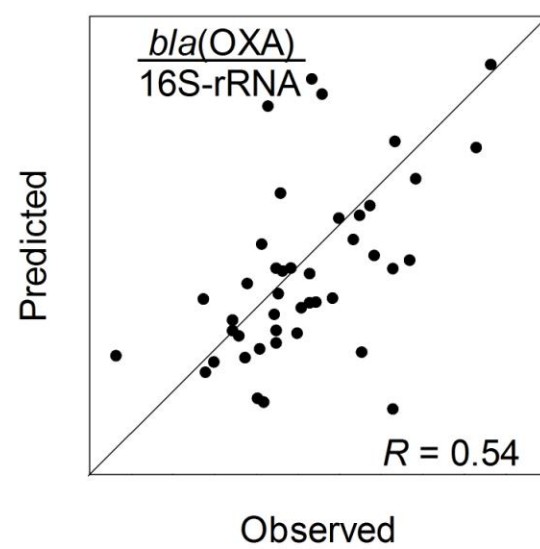

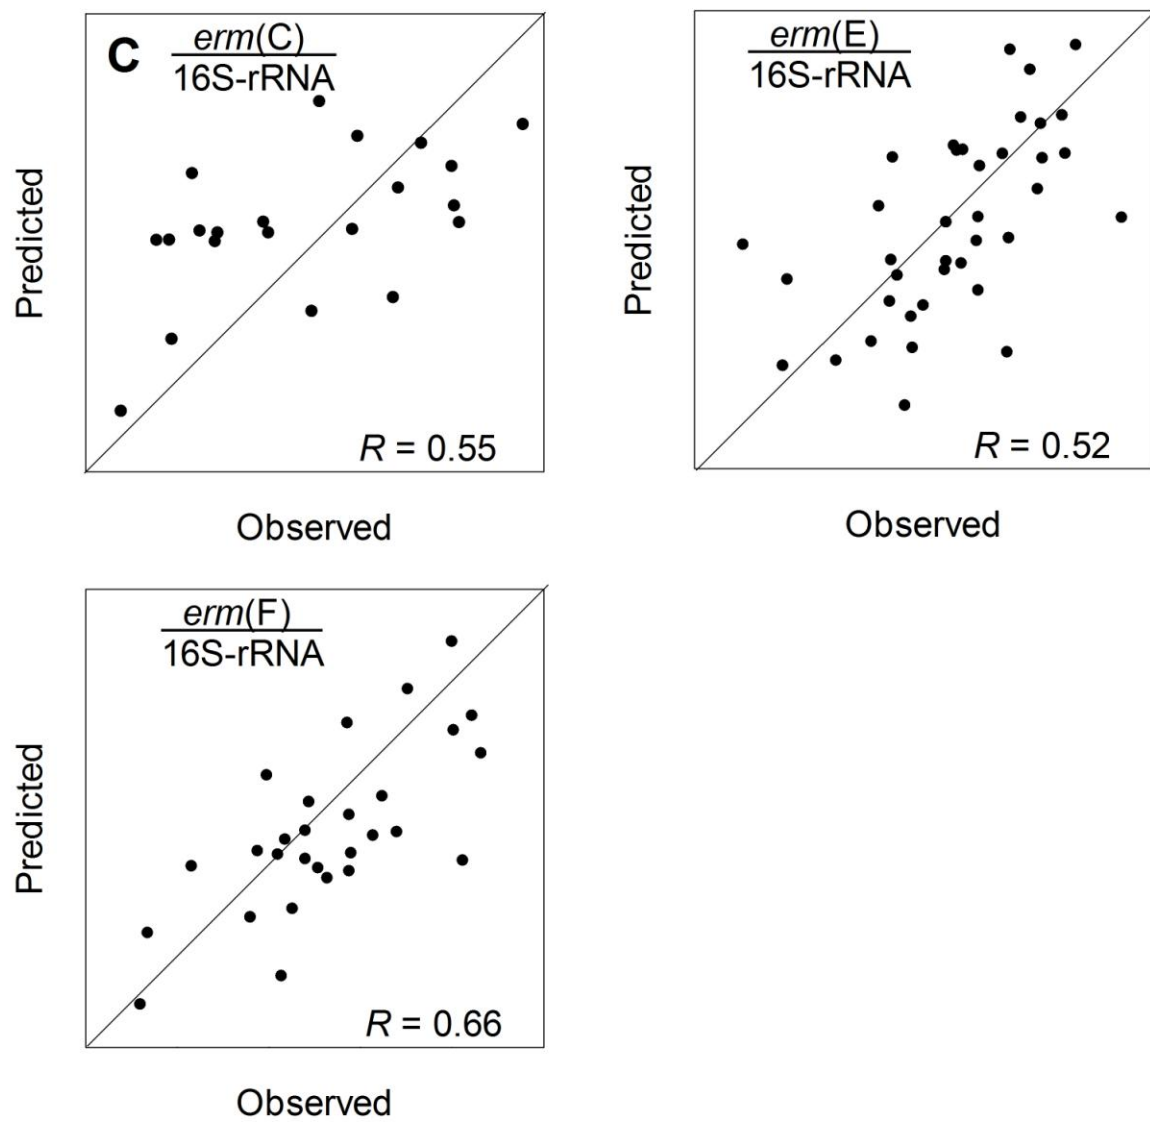

Figure 2
